# Supplementary material
Source: Springer Nature journal article supplement (https://www.springermedizin.de/resource/supplementary/12885_2006_761_MOESM1_ESM.pdf/9470254)

**A.**

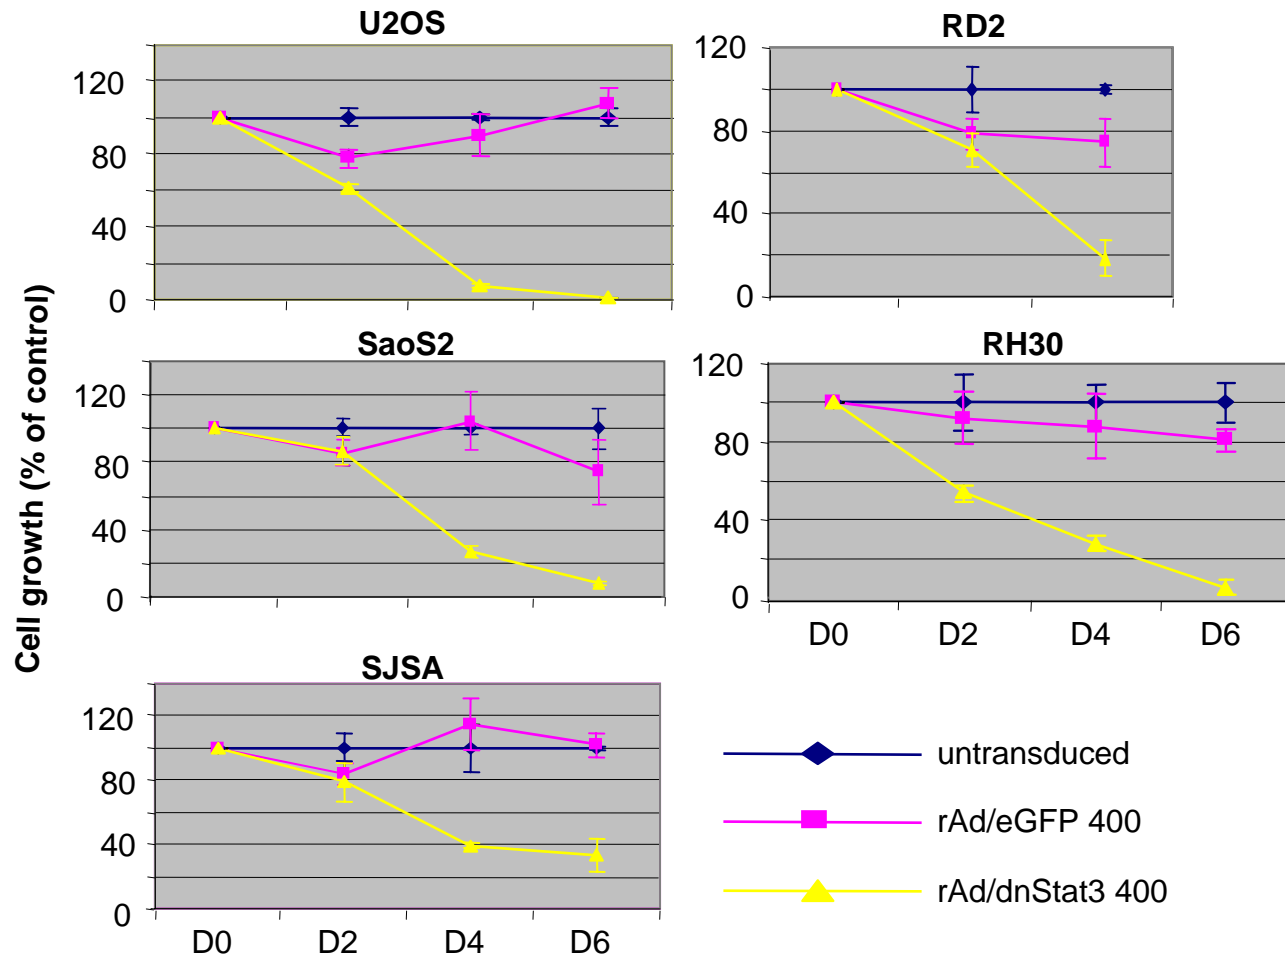

**B.**

**RH30**

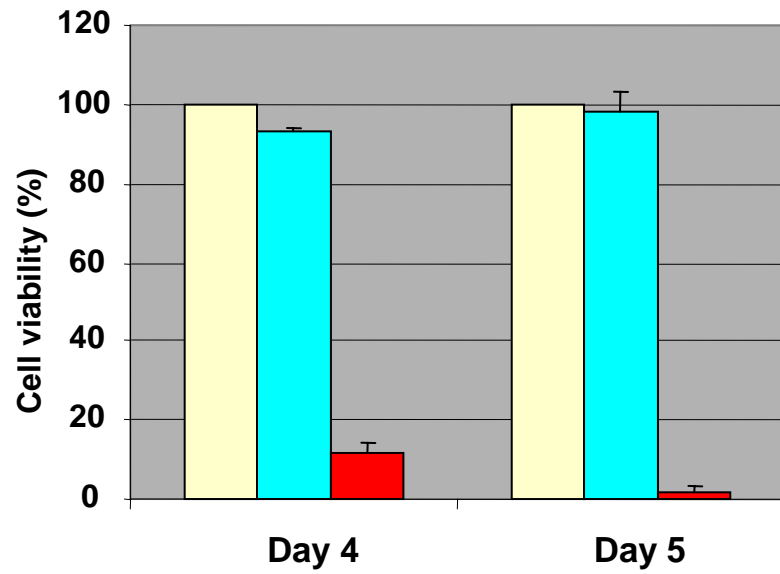

**RD2**

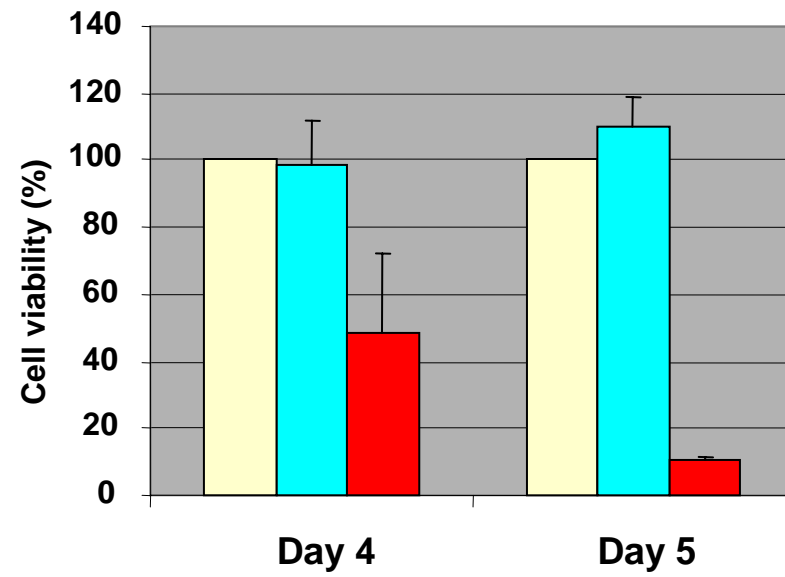

untreated

DMSO

STA-21 30  $\mu$ M

**C.**

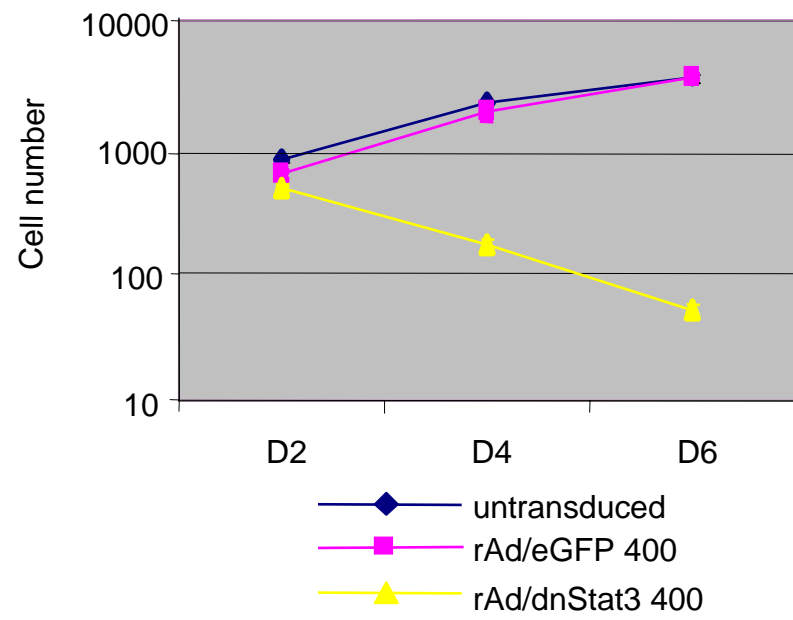

Supplement: MOESM1 [file 9470254]
